# Supplementary material
Source: PubMed Central journal article supplement (PMC4887195)
Supplement: NIHMS90984-supplement-1_si_001.pdf [file NIHMS90984-supplement-1_si_001.pdf]

## Supporting Information

### **Substrate Induced Formation of a Catalytically Competent Binuclear Center and Regulation of Reactivity in a Glycerophosphodiesterase from *Enterobacter aerogenes***

Kieran S. Hadler,<sup>a</sup> Eric A. Tanifum,<sup>b</sup> Sylvia Hsu-Chen Yip,<sup>c</sup> Nataša Mitić,<sup>a</sup> Luke W. Guddat,<sup>a</sup> Colin J. Jackson,<sup>c</sup> Lawrence R. Gahan,<sup>a</sup> Kelly Nguyen,<sup>c</sup> Paul Carr,<sup>c</sup> David L. Ollis,<sup>c</sup> Alvan C. Hengge,<sup>b</sup> James A. Larrabee,<sup>d</sup> Gerhard Schenk<sup>a\*</sup>

<sup>a</sup>School of Molecular and Microbial Sciences, The University of Queensland, St Lucia, Queensland, 4072, Australia; <sup>b</sup>Department of Chemistry and Biochemistry, Utah State University, Logan, UT, 84322, USA; <sup>c</sup>Research School of Chemistry, Australian National University, Canberra, ACT, 0200, Australia; <sup>d</sup>Department of Chemistry and Biochemistry, Middlebury College, Middlebury, VT, 05753, USA

Address for correspondence:

School of Molecular and Microbial Sciences

University of Queensland

St Lucia, Queensland, 4072, Australia

Email: [schenk@uq.edu.au](mailto:schenk@uq.edu.au)

Phone: +61 7 3345 4144

Fax: +61 7 3345 4299

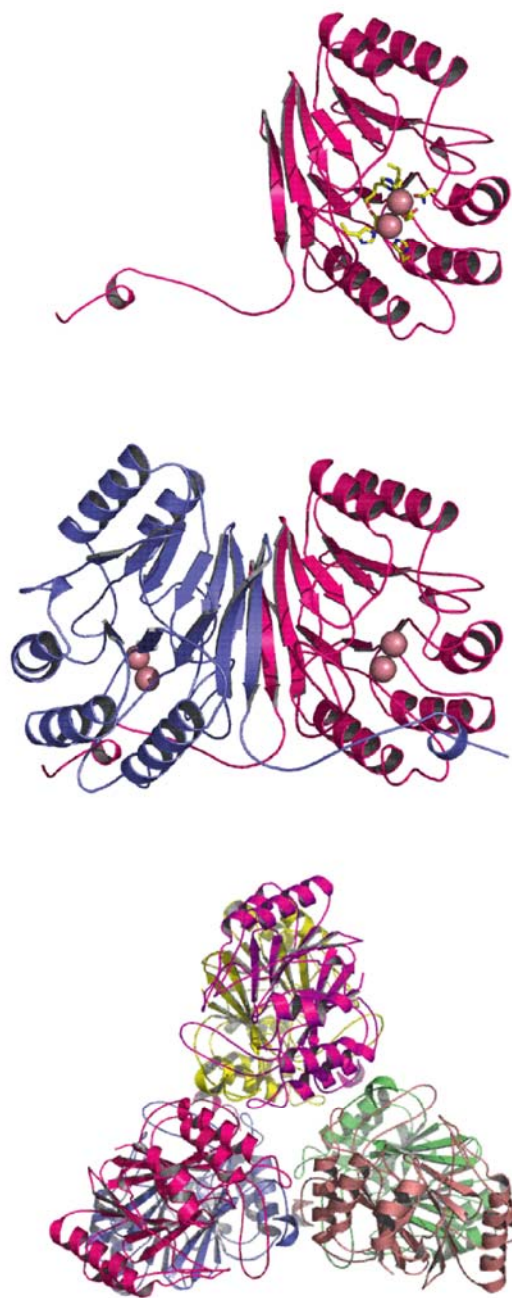

**Figure S1.** Overall structure and oligomeric organization of GpdQ. *Upper Panel.* Monomer with active site metal ions shown as spheres and ligating residues as sticks. *Middle Panel.* Dimer with active site metal ions shown as spheres. *Lower Panel.* Trimer of dimers present in the asymmetric unit.

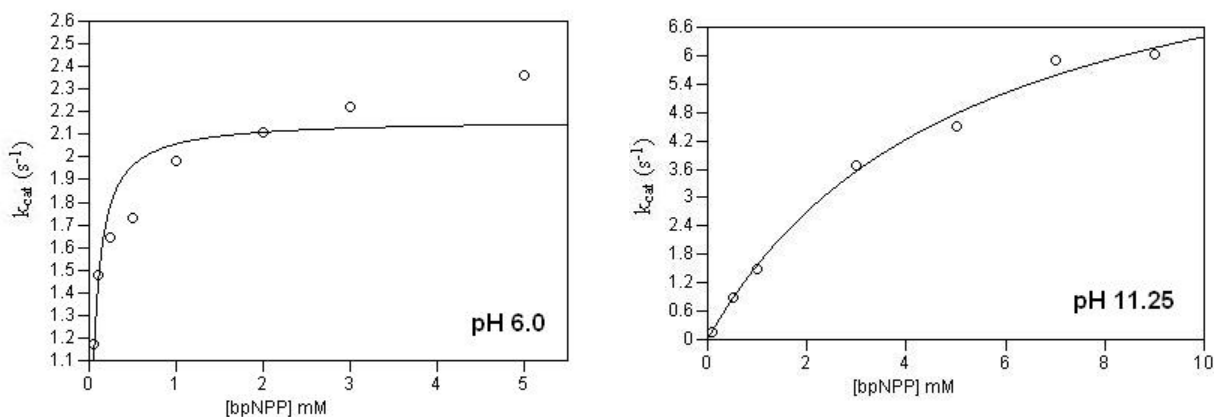

**Figure S2.** Examples of the effect of the substrate concentration (*bpNPP*) on the enzymatic activity of GpdQ. Rates were measured at pH 6.00 and pH 11.25.

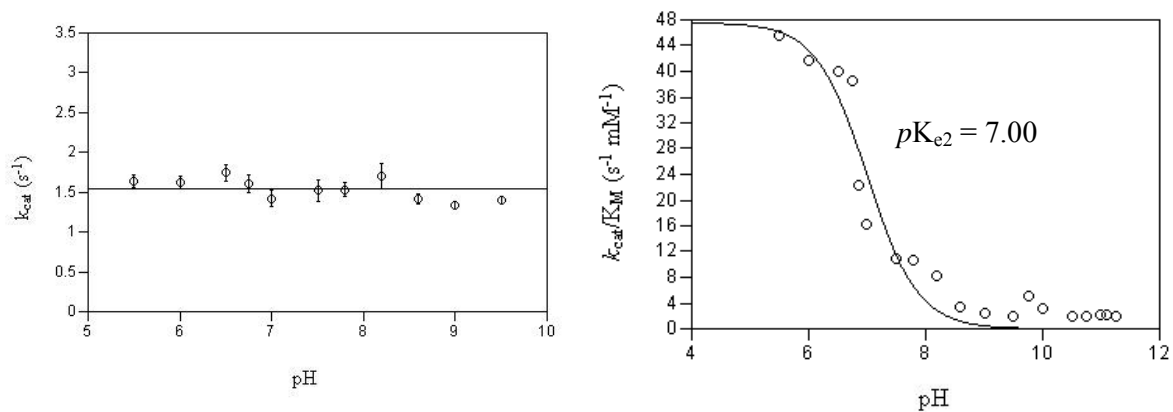

**Figure S3.** pH profile of  $k_{cat}$  and  $k_{cat}/K_M$  for the hydrolysis of *bpNPP* by GpdQ. The data in the lower panel were fit using a modified form of Equation 5, where  $K_{e1} \gg [H^+]$ :

$$\frac{k_{cat}}{K_M} = \frac{k_{cat}}{K_s \left( 1 + \frac{K_{e2}}{[H^+]} \right)}$$

Equation S1

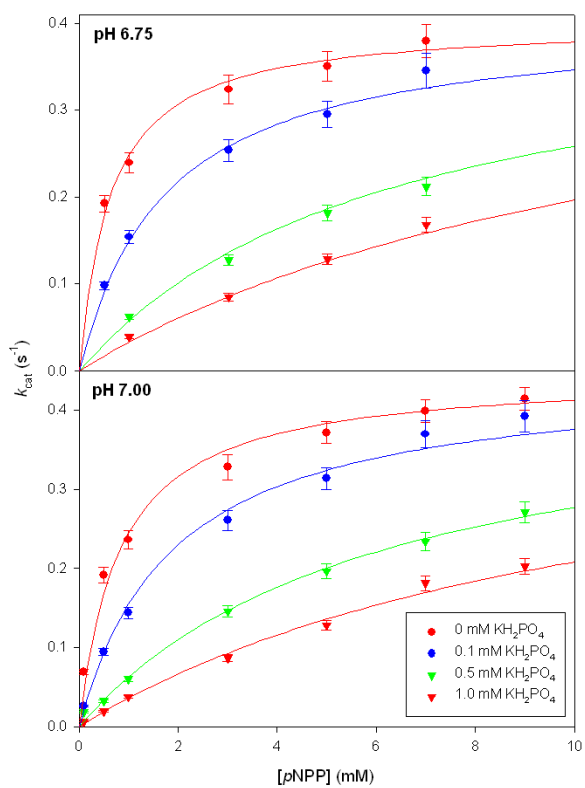

**Figure S4.** Effect of inhibition of 0 mM, 0.1 mM, 0.5 mM and 1.0 mM  $\text{KH}_2\text{PO}_4$  towards the hydrolysis of  $p\text{NPP}$ . Data were measured at pH 7.0 and pH 6.75 under identical conditions and data were analyzed using Equation 6. The mode of inhibition is competitive with  $K_i = 78(6)$  and  $57(4)$   $\mu\text{M}$ , respectively.

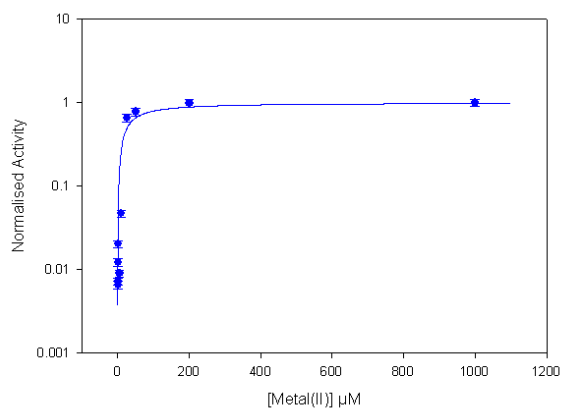

**Figure S5.** Determination of metal binding to GpdQ by measuring activity as a function of added  $\text{Co}^{\text{II}}$ .

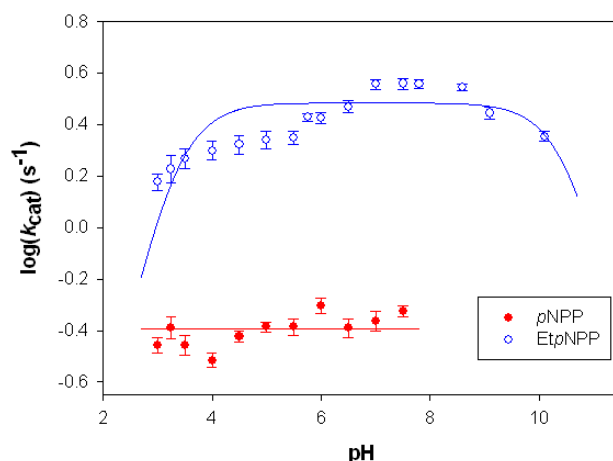

**Figure S6.** pH dependence of  $k_{cat}$  for the hydrolysis of EtpNPP and pNPP where the former has been fit to an equation derived for a model with two protonation equilibria:

$$k_{cat} = \frac{k_{cat,max}}{1 + \frac{[H^+]}{K_{es1}} + \frac{K_{es2}}{[H^+]}} \quad \text{Equation S2}$$

The effect of a viscogen (30% sucrose) on the value of  $k_{cat}/K_M$  for the hydrolysis of EtpNPP was also measured at several pHs. At pH 5.5:  $k_{cat}/K_M = 10.7 \pm 1.6 \text{ s}^{-1} \text{ mM}^{-1}$  (no sucrose),  $9.7 \pm 1.3 \text{ s}^{-1} \text{ mM}^{-1}$  (with 30% sucrose); at pH 7.0:  $k_{cat}/K_M = 5.9 \pm 0.9 \text{ s}^{-1} \text{ mM}^{-1}$  (no sucrose),  $4.9 \pm 0.7 \text{ s}^{-1} \text{ mM}^{-1}$  (with 30% sucrose); at pH 8.6:  $k_{cat}/K_M = 0.42 \pm 0.06 \text{ s}^{-1} \text{ mM}^{-1}$  (no sucrose),  $0.33 \pm 0.05 \text{ s}^{-1} \text{ mM}^{-1}$  (with 30% sucrose).

**Full list of authors for references 61 and 89:**

(61) Kissinger, C. R.; Parge, H. E.; Knighton, D. R.; Lewis, C. T.; Pelletier, L. A.; Tempczyk, A.; Kalish, V. J.; Tucker, K. D.; Showalter, R. E.; Moomaw, E. W.; Gastinel, L. N.; Habuka, N.; Chen, X.; Maldonado, F.; Barker, J. E.; Bacquet, R.; Villafranca, J. E. *Nature* **1995**, *178*, 641-644.

(89) Evdokimov, A.G.; Pokross, M.; Walter, R.L.; Mekel, M.; Barnett, B.L.; Amburgey, J.; Seibel, W.L.; Soper, S.J.; Djung, J.F.; Fairweather, N.; Diven, C.; Rastogi, V.; Grinius, L.; Klanke, C.; Siehnel, R.; Twinem, T.; Andrews, R.; Curnow, A. *Proteins: Struct., Funct., Bioinf.* **2007**, *66*, 538-546.
